# Supplementary material for: Interfacial barriers to gas transport in zeolites: distinguishing internal and external resistances
Source: Royal Society of Chemistry journal article supplement (doi:10.1039/c8cp05834b), 2018-01-01
Supplement: c8cp05834b1.pdf [file c8cp05834b1.pdf]

# **Interfacial Barriers to Gas Transport in Zeolites: Distinguishing Internal and External Resistances**

Ravi C. Dutta<sup>a</sup> and Suresh K. Bhatia<sup>a,\*</sup>

---

\* To whom correspondence may be addressed. Tel.: +61 7 3365 4263. Email: [s.bhatia@uq.edu.au](mailto:s.bhatia@uq.edu.au).

<sup>a</sup> School of Chemical Engineering, The University of Queensland, Brisbane, QLD 4072, Australia.

**Functional form of the force field used to represent bonded interactions in PI:**

$$\begin{aligned}
 U^{bonded} = & \sum_b \left[ k_2(b-b_0)^2 + k_3(b-b_0)^3 + k_4(b-b_0)^4 \right] \\
 & + \sum_a \left[ k_2(\theta-\theta_0)^2 + k_3(\theta-\theta_0)^3 + k_4(\theta-\theta_0)^4 \right] \\
 & + \sum_\phi \left( \left\{ k_1 [1 - \cos(\phi - \phi_1^0)] \right\} + \left\{ k_2 [1 - \cos(2\phi - \phi_2^0)] \right\} \right) \\
 & \quad \left( + \left\{ k_3 [1 - \cos(3\phi - \phi_3^0)] \right\} \right) \\
 & + \sum_b \sum_{b'} k(b-b_0)(b'-b'_0) + \sum_{b,\theta} k(b-b_0)(\theta-\theta_0) \\
 & + \sum_{b,\theta} k(\theta-\theta_0)(\theta'-\theta'_0) + \sum_{\theta,\theta,\psi} k(\theta-\theta_0)(\theta'-\theta'_0) \cos \phi \\
 & + \sum_{b,\phi} (b-b_0) [k_1 \cos \phi + k_2 \cos 2\phi + k_3 \cos 3\phi] \\
 & + \sum_{\theta,\phi} (\theta-\theta_0) [k_1 \cos \phi + k_2 \cos 2\phi + k_3 \cos 3\phi] \\
 & + \sum_\chi k_2 \chi^2
 \end{aligned} \tag{S1}$$

**Table ST1.** Functional form of the force field used to represent the non-bonded interactions in this study (hybrid potential).

| Interaction              | functional form                                                                                                                                                              |
|--------------------------|------------------------------------------------------------------------------------------------------------------------------------------------------------------------------|
| Polymer -Polymer         | $U_{ij}^{non-bond} = \sum_{i,j} \varepsilon_{ij} \left[ 2 \left( \frac{\sigma_{ij}}{r_{ij}} \right)^9 - 3 \left( \frac{\sigma_{ij}}{r_{ij}} \right)^6 \right]$               |
| Polymer-Zeolite          | $U_{ij}^{non-bond} = 4\varepsilon_{ij} \left[ \left( \frac{\sigma_{ij}}{r_{ij}} \right)^{12} - \left( \frac{\sigma_{ij}}{r_{ij}} \right)^6 \right]$                          |
| Polymer-Gas              | $U_{ij}^{non-bond} = 4\varepsilon_{ij} \left[ \left( \frac{\sigma_{ij}}{r_{ij}} \right)^{12} - \left( \frac{\sigma_{ij}}{r_{ij}} \right)^6 \right]$                          |
| Zeolite-Zeolite          | none                                                                                                                                                                         |
| Zeolite-Gas &<br>Gas-Gas | $U_{ij}^{non-bond} = 4\varepsilon_{ij} \left[ \left( \frac{\sigma_{ij}}{r_{ij}} \right)^{12} - \left( \frac{\sigma_{ij}}{r_{ij}} \right)^6 \right] + \frac{q_i q_j}{r_{ij}}$ |

**Table ST2.** Lennard–Jones (12-6) parameters, partial charges for the EPM2 CO<sub>2</sub>, and united-atom H<sub>2</sub>

| Molecule                                | Atom               | $\epsilon_{\text{gas-gas}}$<br>(K <sup>-1</sup> ) | $\sigma_{\text{gas-gas}}$<br>(nm) | $\epsilon_{\text{gas-zeo}}$<br>(K <sup>-1</sup> ) | $\sigma_{\text{gas-zeolite}}$<br>(nm) | q(e)                                                                                                        | Ref  |
|-----------------------------------------|--------------------|---------------------------------------------------|-----------------------------------|---------------------------------------------------|---------------------------------------|-------------------------------------------------------------------------------------------------------------|------|
| Hydrogen<br>(H <sub>2</sub> )           | H <sub>2</sub> _UA | 34.02                                             | 0.296                             | 51.233                                            | 0.262                                 | 0                                                                                                           | 1, 2 |
| Carbon<br>dioxide<br>(CO <sub>2</sub> ) | C_CO <sub>2</sub>  | 28.129                                            | 0.2757                            | 27                                                | 0.290                                 | C_CO <sub>2</sub> = 0.6512<br>O_CO <sub>2</sub> =-0.3256<br>Si <sub>zeo</sub> = +2<br>O <sub>zeo</sub> = -1 | 3, 4 |
|                                         | O_CO <sub>2</sub>  | 80.51                                             | 0.3033                            | 79                                                | 0.305                                 |                                                                                                             |      |

**Table ST3.** Kinetic diameters of gas molecules.

| Molecule        | Kinetic Diameter (Å) | Ref |
|-----------------|----------------------|-----|
| CO <sub>2</sub> | 3.3                  | 5   |
| CH <sub>4</sub> | 3.8                  | 5   |
| H <sub>2</sub>  | 2.9                  | 5   |

**Table ST4.** Characterization of zeolite pore structure

| Zeolite | Limiting window size | Limiting cage<br>Size |
|---------|----------------------|-----------------------|
| SAS     | 4.22                 | 8.99                  |
| MFI     | 4.46                 | -                     |
| PON     | 4.3                  | 4.93                  |

**Table ST5.** Length dependency of corrected diffusion coefficient ( $D_o$ ) of methane in zeolites

| SAS      |                                               | MFI      |                                               | PON      |                                               |
|----------|-----------------------------------------------|----------|-----------------------------------------------|----------|-----------------------------------------------|
| $L$ (nm) | $D_o$<br>( $\times 10^9$ m <sup>2</sup> /sec) | $L$ (nm) | $D_o$<br>( $\times 10^9$ m <sup>2</sup> /sec) | $L$ (nm) | $D_o$<br>( $\times 10^9$ m <sup>2</sup> /sec) |
| 3.15     | 2.0 ( $\pm 0.1$ )                             | 4.224    | 3.1 ( $\pm 0.25$ )                            | 2.97     | 1.1 ( $\pm 0.1$ )                             |
| 4.2      | 2.4 ( $\pm 0.1$ )                             | 6.207    | 3.8 ( $\pm 0.25$ )                            | 4.75     | 1.7 ( $\pm 0.1$ )                             |
| 6.25     | 3.1 ( $\pm 0.1$ )                             | 8.202    | 5.0 ( $\pm 0.5$ )                             | 6.53     | 2.0 ( $\pm 0.1$ )                             |
| 8.3      | 3.8 ( $\pm 0.2$ )                             | 10.19    | 6.8 ( $\pm 0.5$ )                             | 10.09    | 3.6 ( $\pm 0.2$ )                             |
| 10.4     | 4.5 ( $\pm 0.2$ )                             | 14.19    | 10.2 ( $\pm 0.5$ )                            | 13.66    | 4.8 ( $\pm 0.2$ )                             |
| 14.6     | 5.5 ( $\pm 0.3$ )                             |          |                                               |          |                                               |

**Table ST6.** Kinetic and perm-selectivities of the gases

| Gas             | $D_o$ ( $\times 10^{-9}$ m <sup>2</sup> /sec) | $S$ (cc(STP)/cc. atm) | Kinetic selectivity<br>( $H_2/CH_4$ ) | Perm-Selectivity<br>( $H_2/CH_4$ ) |
|-----------------|-----------------------------------------------|-----------------------|---------------------------------------|------------------------------------|
| CH <sub>4</sub> | 7.0 ( $\pm 0.5$ )                             | 13.10822              | 9 ( $\pm 0.2$ )                       | 0.38 ( $\pm 0.05$ )                |
| H <sub>2</sub>  | 63 ( $\pm 3$ )                                | 0.548537              |                                       |                                    |

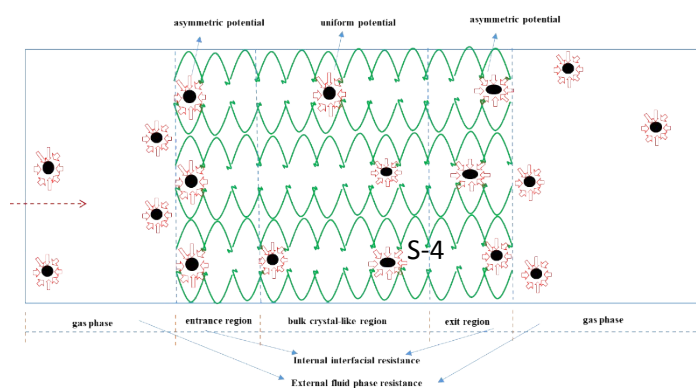

**Figure S1.** Schematic illustration of inside the zeolite and the mean force experienced by the gas molecules at different locations in the pore.

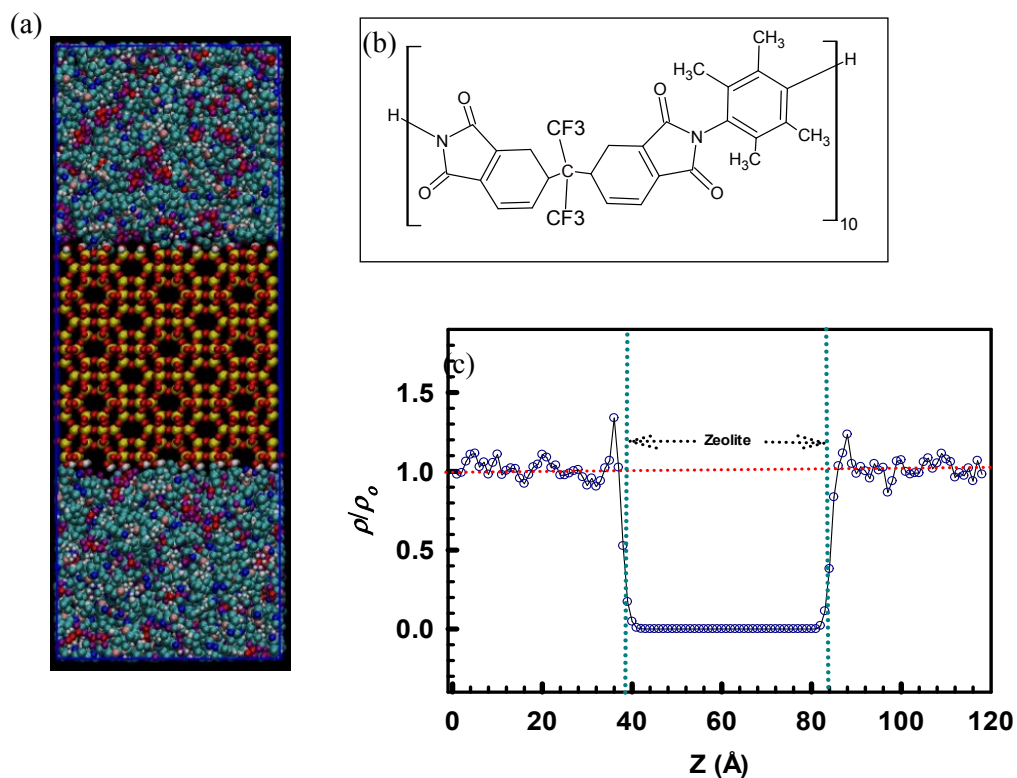

**Figure S2:** Structure of the (a) PI-SAS hybrid system, (b) 6FDA-Durene polyimide polymer chain and (c) Density profile of PI in the PI-SAS composite system at T=300K.

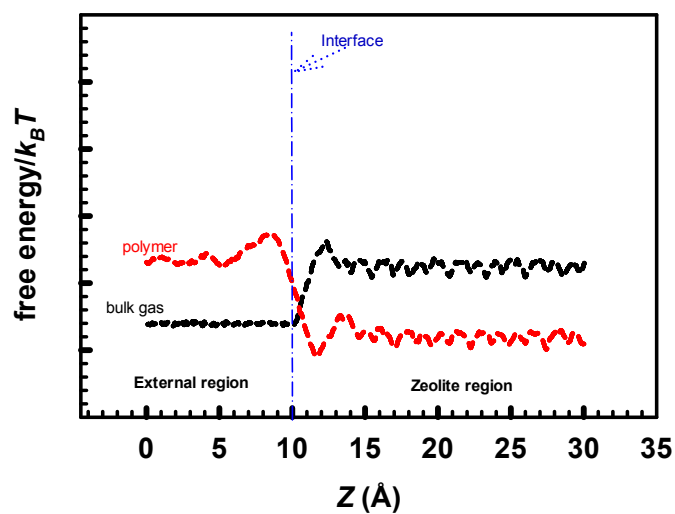

**Figure S3:** Free energy profiles of  $\text{CH}_4$  gas in SAS zeolite at  $T= 300\text{K}$  in the presence of bulk gas and polymer at the loading of  $\sim 1$  mol/u.c.

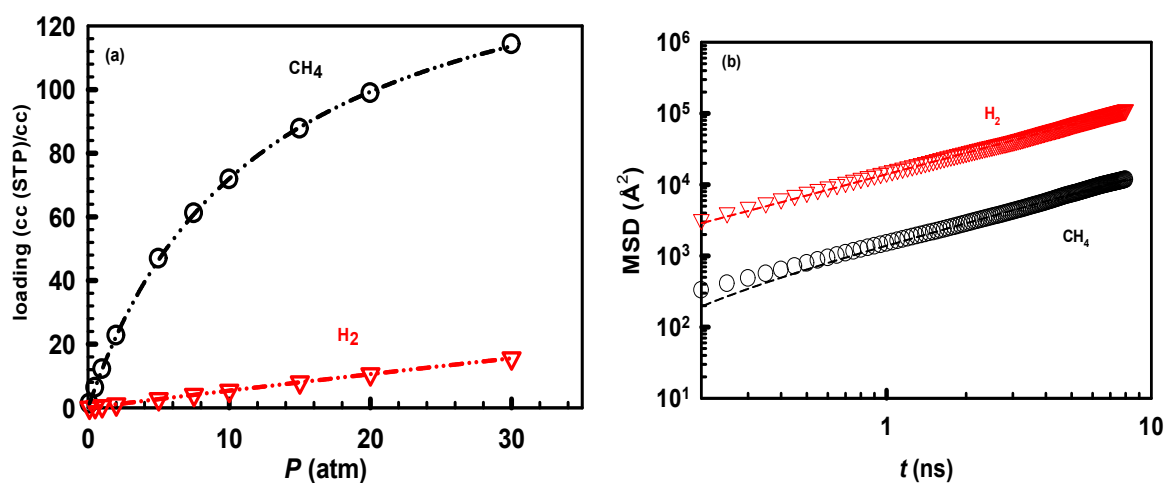

**Figure S4:** (a) Adsorption isotherms of  $\text{CH}_4$  and  $\text{H}_2$  in SAS zeolite at  $T= 300$  K. The dashed lines indicate the fitted adsorption isotherms using the “Langmuir sorption” model eq (15), and (b) log-log plot of centre of mass mean square displacement (MSD) of  $\text{CH}_4$  and  $\text{H}_2$  vs. time (window size average) in SAS zeolite at a loading of 1 molecule per unit cell.

## REFERENCES

1. A. I. Skoulidas, D. M. Ackerman, J. K. Johnson and D. S. Sholl, *Phys. Rev. Lett.*, 2002, **89**, 185901.
2. A. I. Skoulidas and D. S. Sholl, *J. Phys. Chem. A*, 2003, **107**, 10132-10141.
3. J. G. Harris and K. H. Yung, *J. Phys. Chem.*, 1995, **99**, 12021-12024.
4. A. Goj, D. S. Sholl, E. D. Akten and D. Kohen, *J. Phys. Chem. B*, 2002, **106**, 8367-8375.
5. K. C. K. Ahmad Fauzi Ismail, Takeshi Matsuura, *Gas Separation Membranes* Springer International Publishing, Switzerland, 2015.
